# Supplementary material
Source: Springer Nature journal article supplement (https://www.springermedizin.de/resource/supplementary/12913_2009_1071_MOESM5_ESM.pdf/9536270)

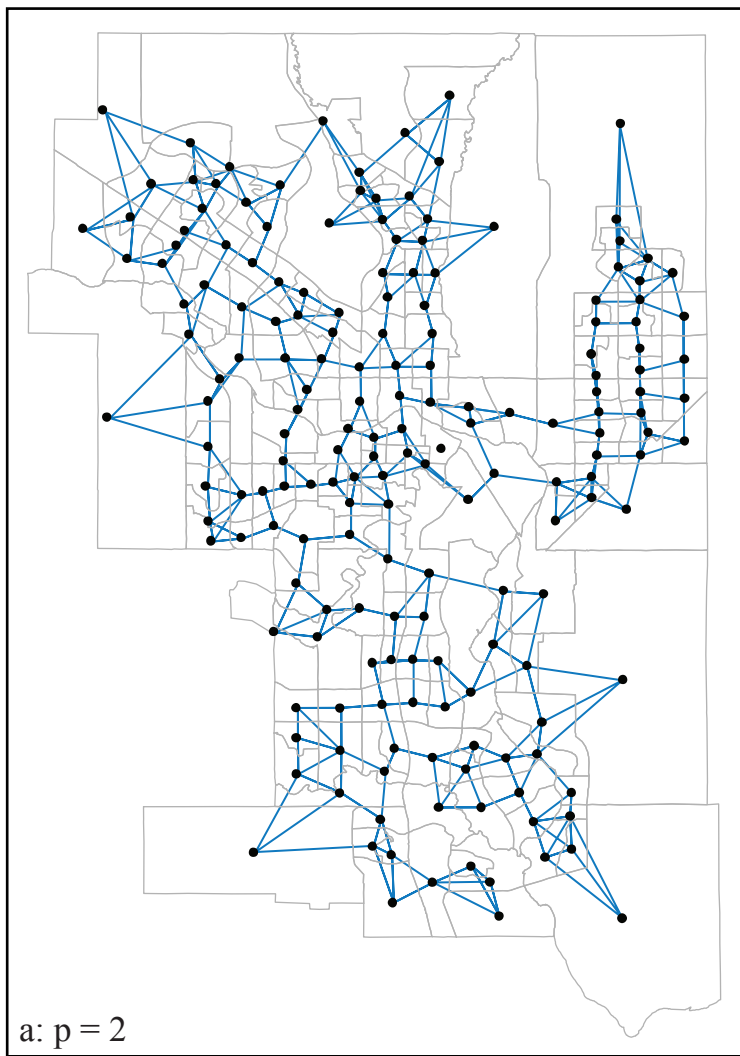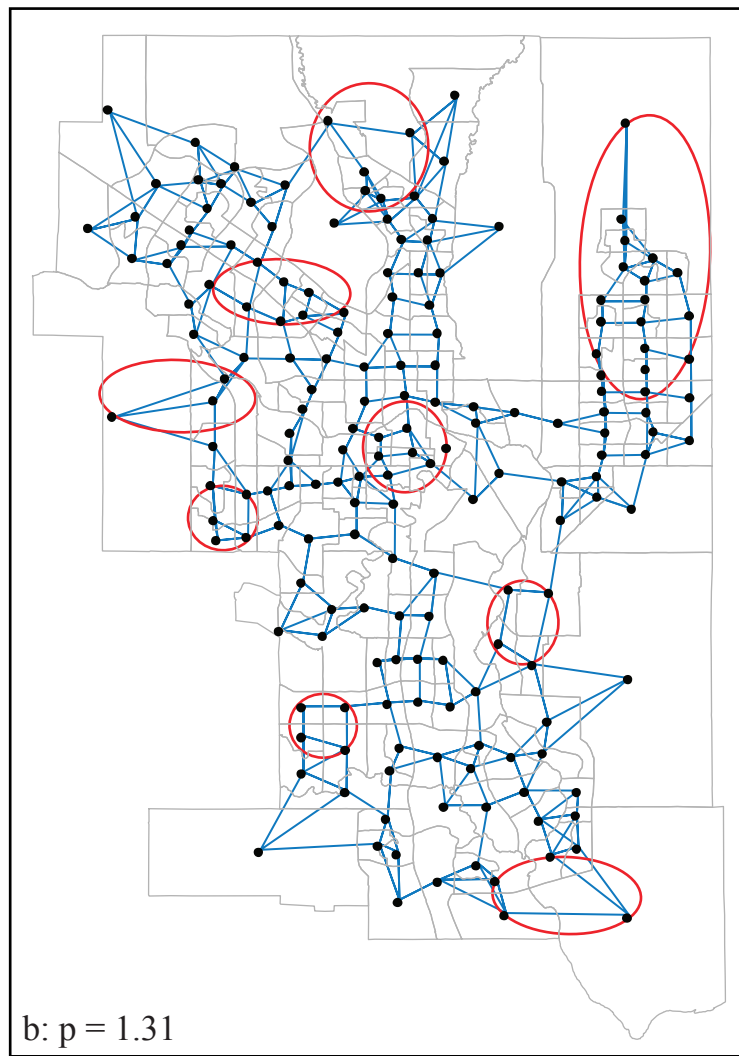

0 3.75 7.5 15 Kilometers

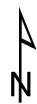

Supplement: MOESM5 [file 9536270]
